# Supplementary material for: Nutritional Content and Health Profile of Non-Dairy Plant-Based Yogurt Alternatives
Source: MDPI journal article supplement (doi:10.3390/nu13114069), 2021-11-14
Supplement: s1 [file s1]

**Table S1.** Nutrient profile of a leading brand of 2% dairy yogurt<sup>1</sup>.

|                    |     |
|--------------------|-----|
| Calories           | 150 |
| Fat (g)            | 3   |
| Saturated fat (g)  | 2   |
| Sodium (mg)        | 40  |
| Carbohydrates (g)  | 16  |
| Fiber (g)          | 0   |
| Sugars (g)         | 13  |
| Protein (g)        | 14  |
| Calcium (% DV)     | 8   |
| Vitamin D (% DV)   | 0   |
| Vitamin B12 (% DV) | n/a |

<sup>1</sup>Data from nutrition label of Tillamook yogurt. n/a = not available

**Table S2.** Median (Q1–Q3) values of Selected Nutrients<sup>1</sup> of Dairy and Non-dairy plant-based yogurt alternatives.

|                   | Dairy yogurts              | Non-dairy yogurt alternatives |         |
|-------------------|----------------------------|-------------------------------|---------|
| n                 | 57                         | 25                            | p-value |
| Calories (kcal)   | 130 (110–150) <sup>a</sup> | 145 (130–170) <sup>b</sup>    | 0.004   |
| Saturated fat (g) | 1.5 (1–2.5)                | 1 (0.5–2.87)                  | 0.45    |
| Protein (g)       | 12 (11–15) <sup>a</sup>    | 4.5 (3–6) <sup>b</sup>        | <0.001  |
| Calcium (% DV)    | 10 (10–15) <sup>a</sup>    | 10 (4–10) <sup>b</sup>        | 0.007   |

<sup>1</sup>Analysis of data reported in ref [26].

Different lowercase letters in the same row indicates significant differences between dairy and non-dairy alternatives. P<0.05 is considered statistically significant.

Table S3. The effects of product type (non-dairy yogurts versus non-dairy beverage) and base type (almond, cashew, etc.).

| <b>Factor</b>              | <b>df</b> | <b>F-value</b> | <b>p-value</b>   |
|----------------------------|-----------|----------------|------------------|
| <u>Calories</u>            |           |                |                  |
| <b>Product</b>             | <b>1</b>  | <b>65.65</b>   | <b>7.93E-14</b>  |
| <b>Base</b>                | <b>8</b>  | <b>6.82</b>    | <b>8.25E-08</b>  |
| <b>Product x Base</b>      | <b>2</b>  | <b>9.94</b>    | <b>8.07E-05</b>  |
| <u>Fat</u>                 |           |                |                  |
| <b>Product</b>             | <b>1</b>  | <b>16.65</b>   | <b>6.75E-05</b>  |
| <b>Base</b>                | <b>8</b>  | <b>4.88</b>    | <b>1.84E-05</b>  |
| <b>Product x Base</b>      | <b>2</b>  | <b>2.99</b>    | <b>5.26E-02</b>  |
| <u>Saturated Fat</u>       |           |                |                  |
| <b>Product</b>             | <b>1</b>  | <b>472.02</b>  | <b>&lt;2E-16</b> |
| <b>Base</b>                | <b>8</b>  | <b>21.93</b>   | <b>&lt;2E-16</b> |
| <b>Product x Base</b>      | <b>2</b>  | <b>17.93</b>   | <b>7.91E-08</b>  |
| <u>Sodium</u>              |           |                |                  |
| <b>Product</b>             | <b>1</b>  | <b>140.4</b>   | <b>&lt;2E-16</b> |
| <b>Base</b>                | <b>8</b>  | <b>3.6</b>     | <b>6.58E-04</b>  |
| <b>Product x Base</b>      | <b>2</b>  | <b>13.85</b>   | <b>2.55E-06</b>  |
| <u>Total Carbohydrates</u> |           |                |                  |
| <b>Product</b>             | <b>1</b>  | <b>100.12</b>  | <b>&lt;2E-16</b> |
| <b>Base</b>                | <b>8</b>  | <b>10.34</b>   | <b>7.25E-12</b>  |
| <b>Product x Base</b>      | <b>2</b>  | <b>12.69</b>   | <b>6.99E-06</b>  |
| <u>Fiber</u>               |           |                |                  |
| <b>Product</b>             | <b>1</b>  | <b>4.61</b>    | <b>3.30E-02</b>  |
| <b>Base</b>                | <b>8</b>  | <b>6.66</b>    | <b>1.29E-07</b>  |
| <b>Product x Base</b>      | <b>2</b>  | <b>5.48</b>    | <b>5.00E-03</b>  |
| <u>Sugar</u>               |           |                |                  |
| <b>Product</b>             | <b>1</b>  | <b>48.6</b>    | <b>5.75E-11</b>  |
| <b>Base</b>                | <b>8</b>  | <b>2.32</b>    | <b>2.20E-02</b>  |
| <b>Product x Base</b>      | <b>2</b>  | <b>5.75</b>    | <b>4.00E-03</b>  |
| <u>Protein</u>             |           |                |                  |
| <b>Product</b>             | <b>1</b>  | <b>20.59</b>   | <b>1.04E-05</b>  |
| <b>Base</b>                | <b>8</b>  | <b>62.83</b>   | <b>&lt;2E-16</b> |
| <b>Product x Base</b>      | <b>2</b>  | <b>10</b>      | <b>7.65E-05</b>  |

Calcium

|                       |          |              |                 |
|-----------------------|----------|--------------|-----------------|
| <b>Product</b>        | <b>1</b> | <b>17.81</b> | <b>3.86E-05</b> |
| <b>Base</b>           | <b>8</b> | <b>6.86</b>  | <b>7.35E-08</b> |
| <b>Product x Base</b> | <b>2</b> | <b>11.31</b> | <b>2.37E-05</b> |

Vitamin D

|                       |          |             |                 |
|-----------------------|----------|-------------|-----------------|
| Product               | 1        | 0.15        | 6.99E-01        |
| <b>Base</b>           | <b>8</b> | <b>6.36</b> | <b>2.90E-07</b> |
| <b>Product x Base</b> | <b>2</b> | <b>15</b>   | <b>9.46E-07</b> |

Vitamin B12

|                |          |              |                 |
|----------------|----------|--------------|-----------------|
| <b>Product</b> | <b>1</b> | <b>20.07</b> | <b>1.32E-05</b> |
| <b>Base</b>    | <b>8</b> | <b>7.55</b>  | <b>1.12E-08</b> |
| Product x Base | 2        | 0.72         | 4.88E-01        |

Analysis was conducted using a two-way analysis of variance for each nutrient. Significant factors ( $P < 0.05$ ) are in bold

**Table S4.** Median (Q1-Q3) of the fortification levels of Calcium, Vitamin D and B12 (expressed as % DV) of non-dairy yogurt alternatives and non-dairy, plant-based multi-serve beverages.

|              | Calcium |                         |          |                         | Vitamin D |                         |          |                         | Vitamin B12 |                           |          |                         |
|--------------|---------|-------------------------|----------|-------------------------|-----------|-------------------------|----------|-------------------------|-------------|---------------------------|----------|-------------------------|
|              | Yogurt  |                         | Beverage |                         | Yogurt    |                         | Beverage |                         | Yogurt      |                           | Beverage |                         |
|              | n       | median (Q1–Q3)          | n        | median (Q1–Q3)          | n         | median (Q1–Q3)          | n        | median (Q1–Q3)          | n           | median (Q1–Q3)            | n        | median (Q1–Q3)          |
| Almond       | 35      | 10 (10–11) <sup>a</sup> | 53       | 30 (30–35) <sup>b</sup> | 16        | 6 (6–10) <sup>a</sup>   | 58       | 25 (15–25) <sup>b</sup> | 0           |                           | 13       | 25 (25–35)              |
| Cashew       | 0       |                         | 5        | 10 (10–45)              | 0         |                         | 4        | 17.5 (10–25)            | 0           |                           | 2        | 120 (120–120)           |
| Coconut      | 37      | 25 (15–30)              | 19       | 20 (10–32.5)            | 25        | 10 (10–25)              | 20       | 12.5 (10–25)            | 25          | 40 (25–50)                | 14       | 50 (35–120)             |
| Oats         | 13      | 10 (10–10) <sup>a</sup> | 44       | 25 (20–25) <sup>b</sup> | 8         | 10 (10–10)              | 38       | 20 (11.25–20)           | 8           | 30 (10–50)                | 29       | 40 (25–50)              |
| Pea          | 0       |                         | 14       | 35 (25–35)              | 0         |                         | 14       | 30 (25–30)              | 0           |                           | 14       | 45 (35–100)             |
| Seeds        | 0       |                         | 20       | 30 (20–30)              | 0         |                         | 19       | 10 (10–25)              | 0           |                           | 11       | 25 (25–50)              |
| Soy          | 11      | 15 (8–15) <sup>a</sup>  | 39       | 25 (25–30) <sup>b</sup> | 7         | 10 (10–10)              | 35       | 25 (15–25)              | 0           |                           | 32       | 50 (50–120)             |
| Legume blend | 21      | 20 (17–20) <sup>a</sup> | 18       | 30 (25–30) <sup>b</sup> | 21        | 35 (10–40)              | 18       | 12.5 (10–43.8)          | 21          | 40 (30–40)                | 5        | 60 (60–60)              |
| Others       | 0       |                         | 27       | 30 (25–35)              | 0         |                         | 23       | 25 (15–25)              | 0           |                           | 18       | 50 (25–50)              |
| Total        | 117     | 15 (10–20) <sup>a</sup> | 239      | 30 (25–35) <sup>b</sup> | 77        | 10 (10–25) <sup>a</sup> | 229      | 20 (10–25) <sup>b</sup> | 54          | 40 (25–47.5) <sup>a</sup> | 138      | 50 (25–60) <sup>b</sup> |

Different lowercase letters indicate significant differences within a nutrient between non-dairy yogurt alternatives and non-dairy, plant-based multi-serve beverages.  $P < 0.05$  is considered statistically significant.
